# Supplementary material for: Self-powered PtNi-polyaniline films for converting rain energy into electricity
Source: Royal Society of Chemistry journal article supplement (doi:10.1039/d3ra03526c), 2023-01-01
Supplement: d3ra03526c1.pdf [file d3ra03526c1.pdf]

Supplementary Figures

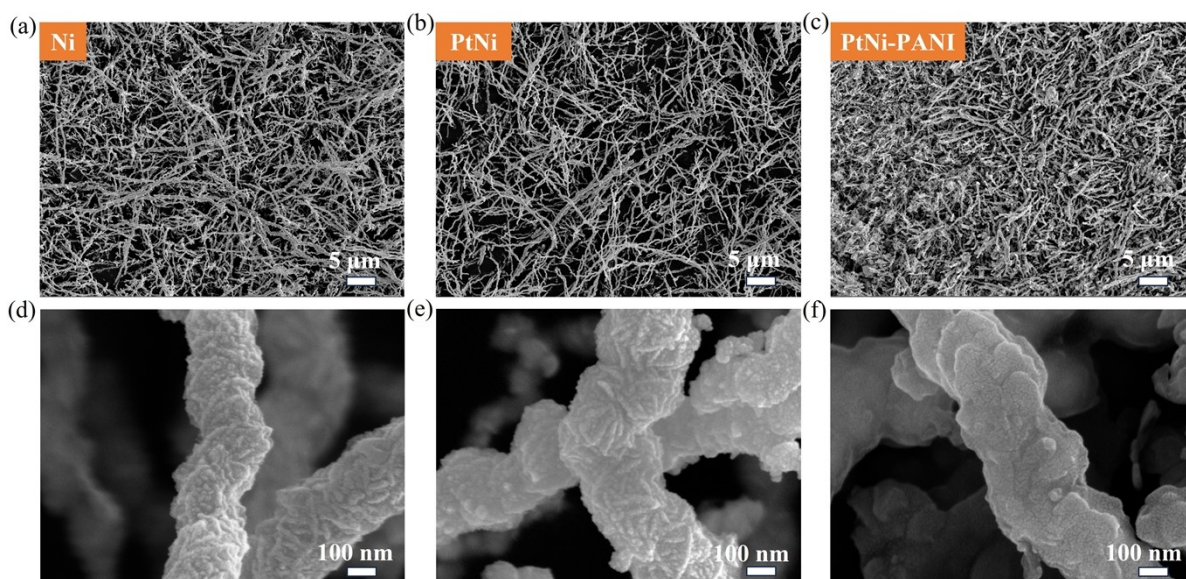

Fig. S1 SEM photographs of (a, d) bare Ni, (b, e) PtNi and (c, f) PtNi-PANI materials.

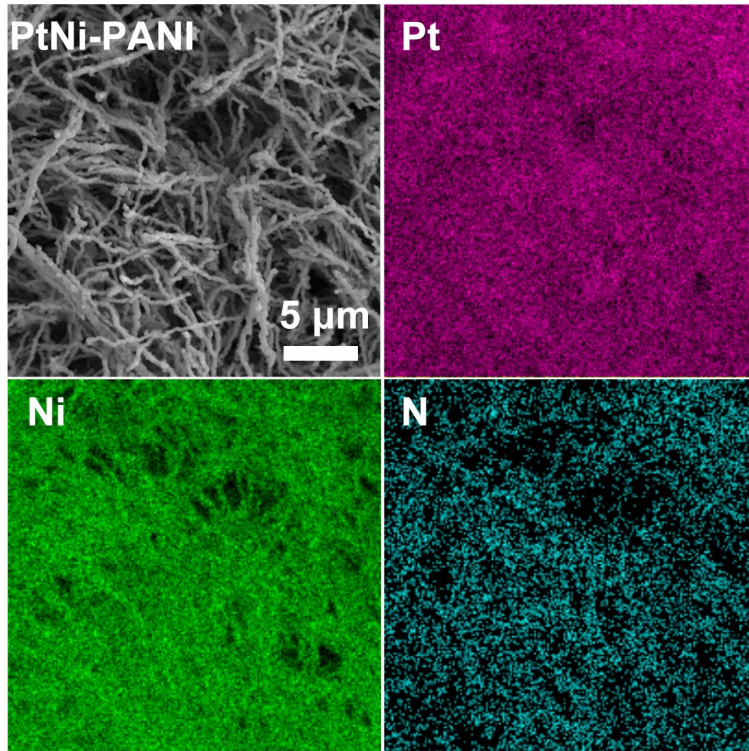

Fig. S2 Elemental-mapping images of PtNi-PANI film.

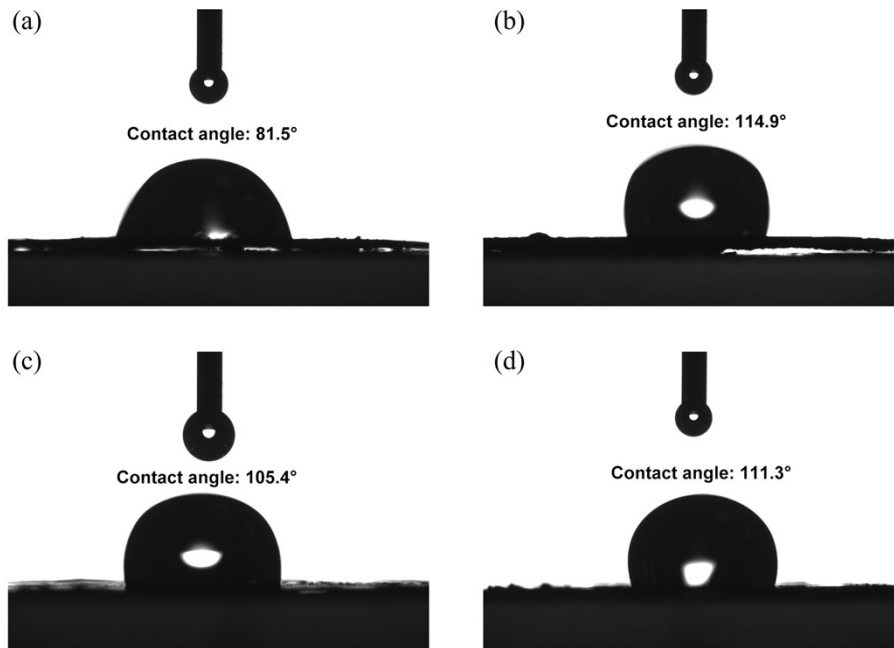

**Fig. S3** The contact angles of (a)&(b) PtNi and (c)&(d) PtNi-PANI films by dropping (a, c) 0.6 M NaCl droplet and (b, d) pure water, respectively.

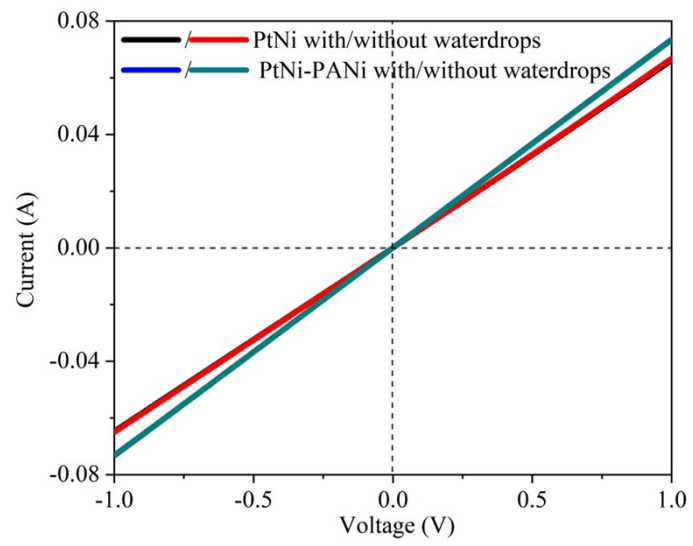

**Fig. 54** The *I*-*V* curves without and with dropping 0.6 M NaCl aqueous solutions onto PtNi and PtNi-PANI films.

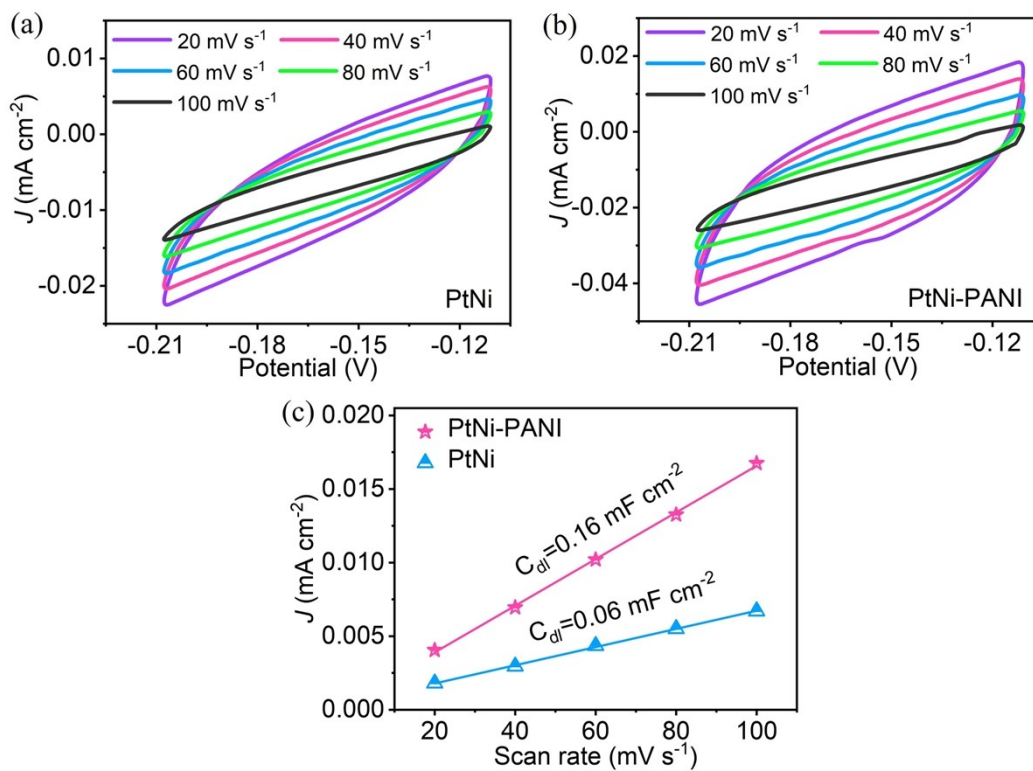

Fig. S5 CV curves of (a) PtNi and (b) PtNi-PANI films at different scan rates and (c) the corresponding linear fitting curve.

## Supplementary Tables

**Table S1** The composition of the real rain collected in Qingdao of China.

|                                     | KCl  | NaCl | NaNO <sub>3</sub> | Na <sub>2</sub> SO <sub>4</sub> | (NH <sub>4</sub> ) <sub>2</sub> SO <sub>4</sub> | MgCl <sub>2</sub> | CaCl <sub>2</sub> | CaSO <sub>4</sub> | Na <sub>2</sub> CO <sub>3</sub> |
|-------------------------------------|------|------|-------------------|---------------------------------|-------------------------------------------------|-------------------|-------------------|-------------------|---------------------------------|
| Concentration (mg L <sup>-1</sup> ) | 4.10 | 2.05 | 8.33              | 1.42                            | 13.73                                           | 32.78             | 47.90             | 34.43             | 10.60                           |

**Table S2** Electrical data by dropping real rain collecting from QingDao of China onto rain-sensitive PtNi-PANI tailored device.

|           | Current ( $\mu\text{A}$ ) | Voltage ( $\mu\text{V}$ ) | Power ( $\text{pW}$ ) |
|-----------|---------------------------|---------------------------|-----------------------|
| Real rain | $0.27 \pm 0.06$           | $36.20 \pm 11.70$         | $20.87 \pm 3.70$      |
